# Supplementary material for: Alternating poly(lactic acid)/poly(ethylene-co-butylene) supramolecular multiblock copolymers with tunable shape memory and self-healing properties
Source: Royal Society of Chemistry journal article supplement (doi:10.1039/c5py00742a), 2015-01-01
Supplement: c5py00742a1.pdf [file c5py00742a1.pdf]

## Supporting Information

### **Alternating Poly(lactic acid)/Poly(ethylene-*co*-butylene) Supramolecular Multiblock Copolymers With Tunable Shape Memory and Self-Healing Property**

Ruoxing Chang,<sup>1</sup> Yongfeng Huang,<sup>1</sup> Guorong Shan,<sup>1</sup> Yongzhong Bao,<sup>1</sup>

Xueyan Yun,<sup>2</sup> Tungalag Dong,<sup>2</sup> Pengju Pan<sup>\*,1</sup>

<sup>1</sup>*State Key Laboratory of Chemical Engineering, College of Chemical and Biological Engineering, Zhejiang University, 38 Zheda Road, Hangzhou 310027, China*

<sup>2</sup>*College of Food Science and Engineering, Inner Mongolia Agricultural University, Hohhot, Inner Mongolia 010018, China*

\*Correspondence author. Tel.: +86-571-87951334, email: [panpengju@zju.edu.cn](mailto:panpengju@zju.edu.cn)

### Measurement of transmission electron microscopy

Transmission electron microscopy (TEM) images were acquired on a JEM-1230 TEM instrument (JEOL, Tokyo, Japan) operated at an accelerating voltage of 80 kV. The sample was cryo-microtomed at  $-90\text{ }^{\circ}\text{C}$  on a Leica EM UC7 ultramicrotome (Leica, Germany) and exposed to  $\text{OsO}_4$  vapors for 1 h at room temperature before measurement.

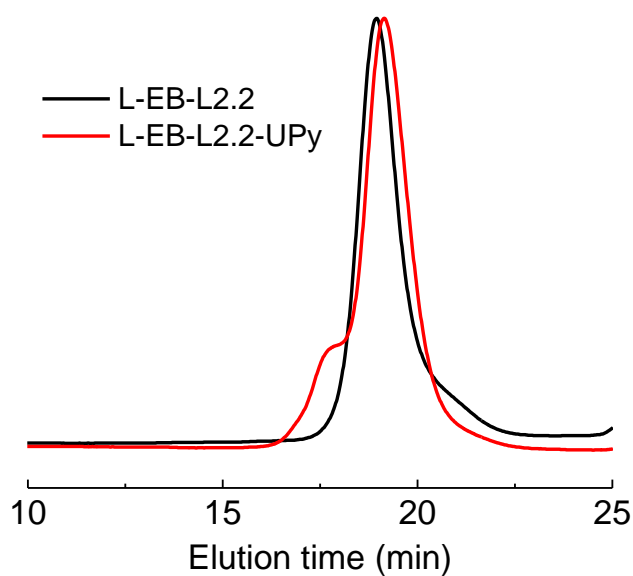

**Fig. S1** GPC traces of PLA-PEB-PLA triblock oligomer and its UPy-bonded SMP.

L-EB-L2.2:  $M_n = 10.3\text{ kg/mol}$ , PDI = 1.15; L-EB-L2.2-UPy:  $M_n = 11.7\text{ kg/mol}$ , PDI = 1.22.

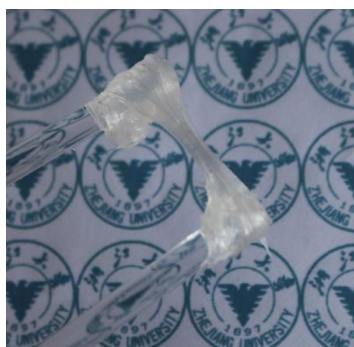

L-EB-L0.6

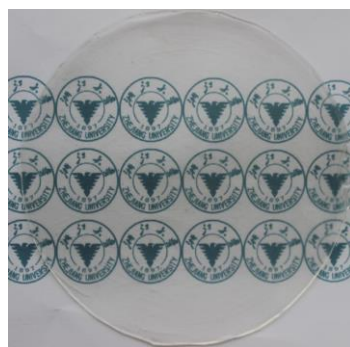

L-EB-L0.6-UPy

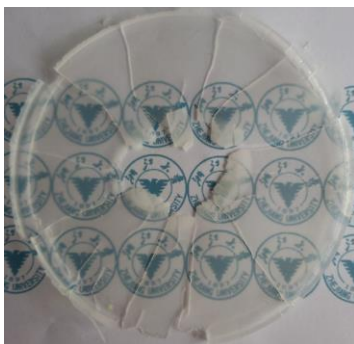

L-EB-L1.4

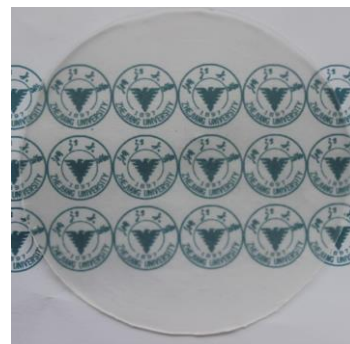

L-EB-L1.4-UPy

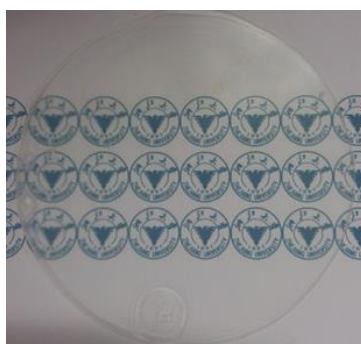

DL-EB-DL2.3

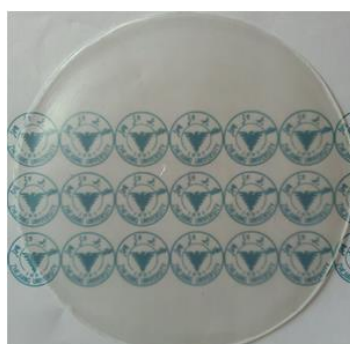

DL-EB-DL2.3-UPy

**Fig. S2** Representative images of PLA-PEB-PLA triblock oligomers and their UPy-bonded SMPs after solvent casting.

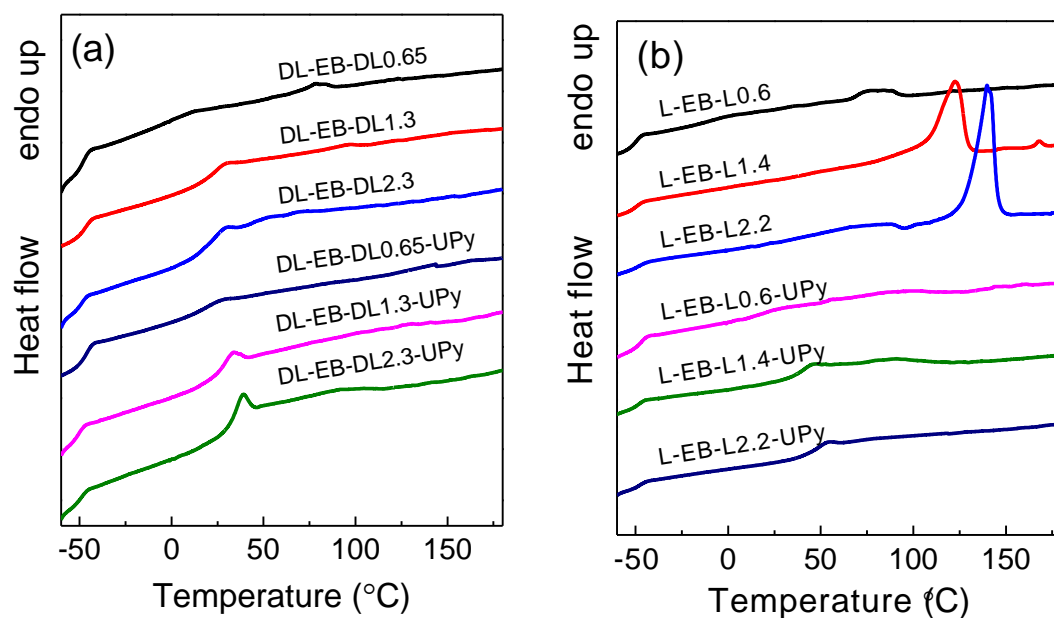

**Fig. S3** DSC heating curves of solvent-cast PLA-PEB-PLA triblock oligomers and their UPy-bonded SMPs with (a) atactic PDLLA and (b) isotactic PLLA blocks.

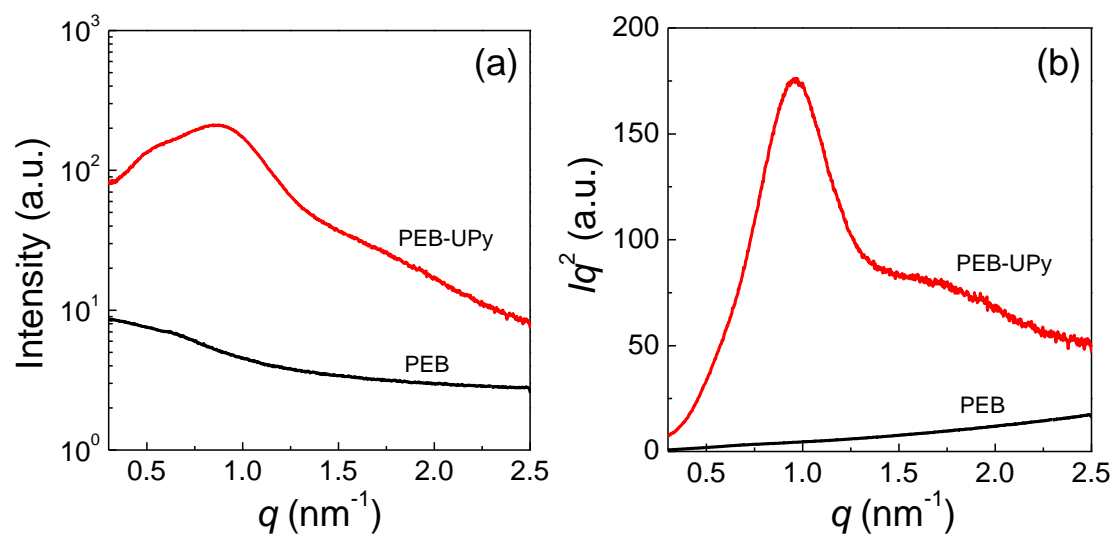

**Fig. S4** (a) Original and (b) Lorenz-corrected SAXS profiles of PEB and its UPy-bonded SMP.

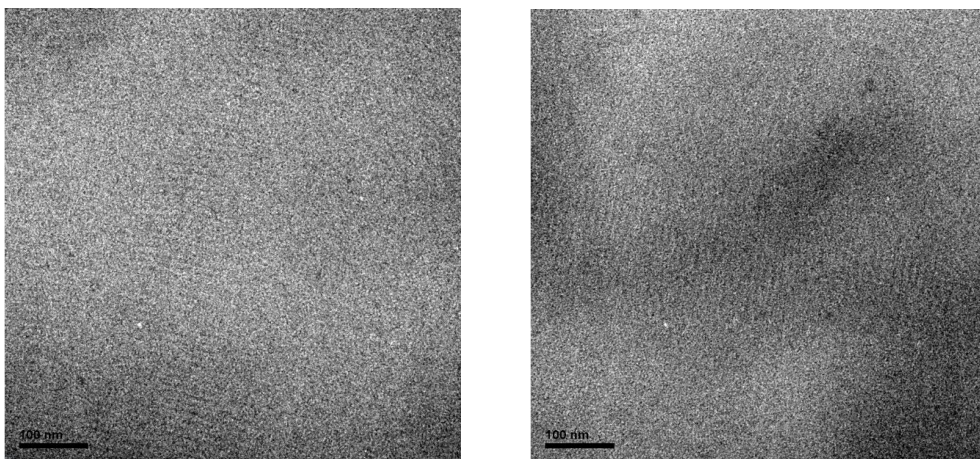

**Fig. S5:** TEM photographs of L-EB-L2.2-UPy SMP.

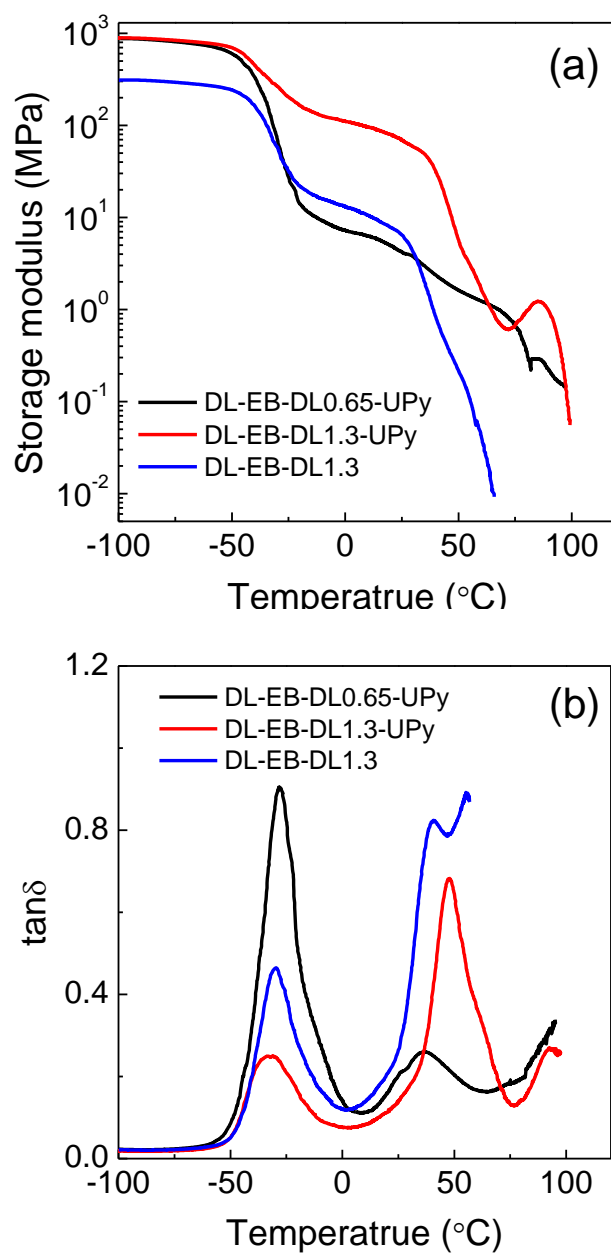

**Fig. S6** Representative DMA curves of (a) storage modulus and (b)  $\tan\delta$  as a function of temperature for PLA-PEB-PLA triblock oligomers and their UPy-bonded SMPs.

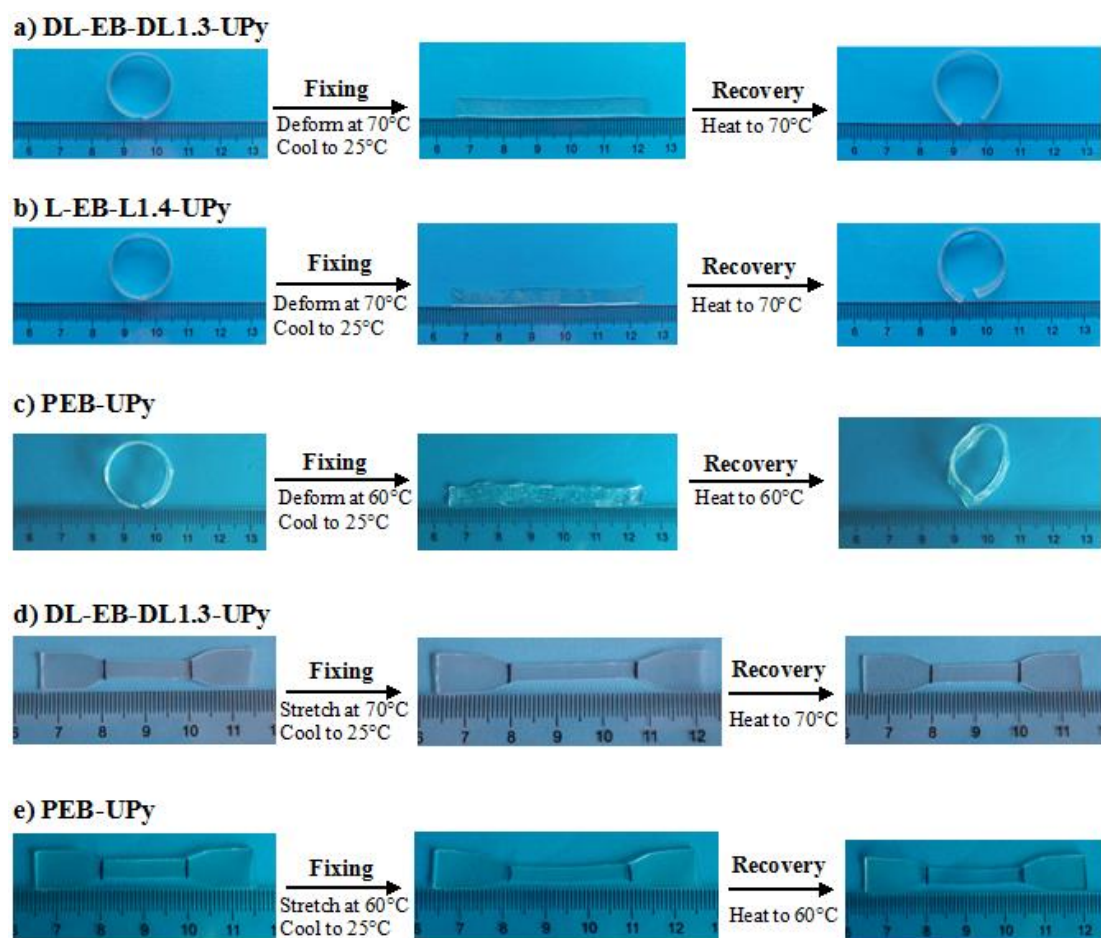

**Fig. S7** Shape memory properties of UPy-bonded PLA-PEB-PLA and PEB SMPs.



a) DL-EB-DL1.3-UPy

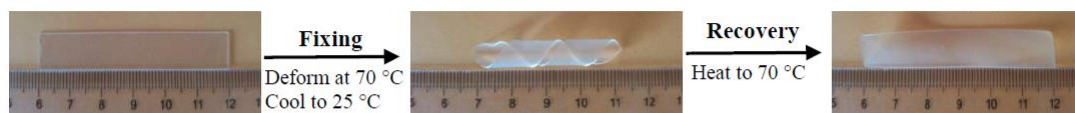

b) DL-EB-DL2.3-UPy

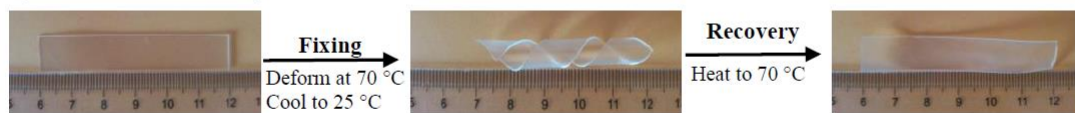

c) L-EB-L0.6-UPy

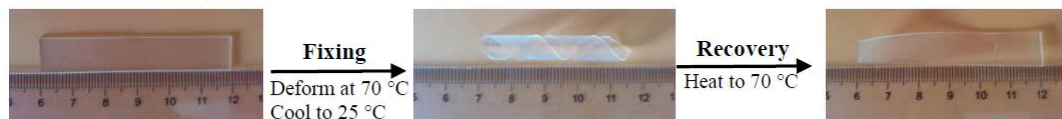

d) L-EB-L1.4-UPy

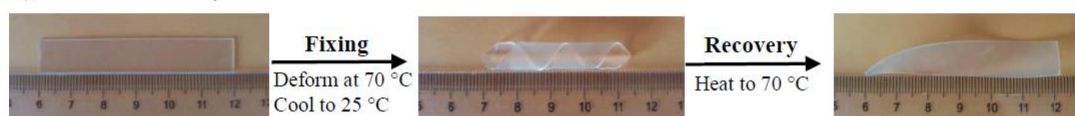

e) L-EB-L2.2-UPy

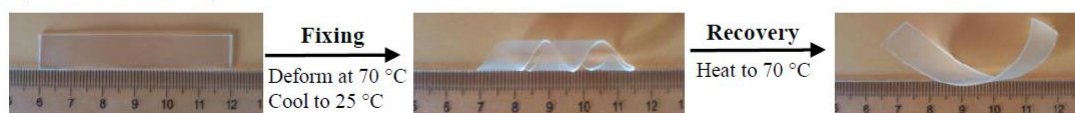

**Fig. S8** Shape memory properties of UPy-bonded PLA-PEB-PLA SMPs.

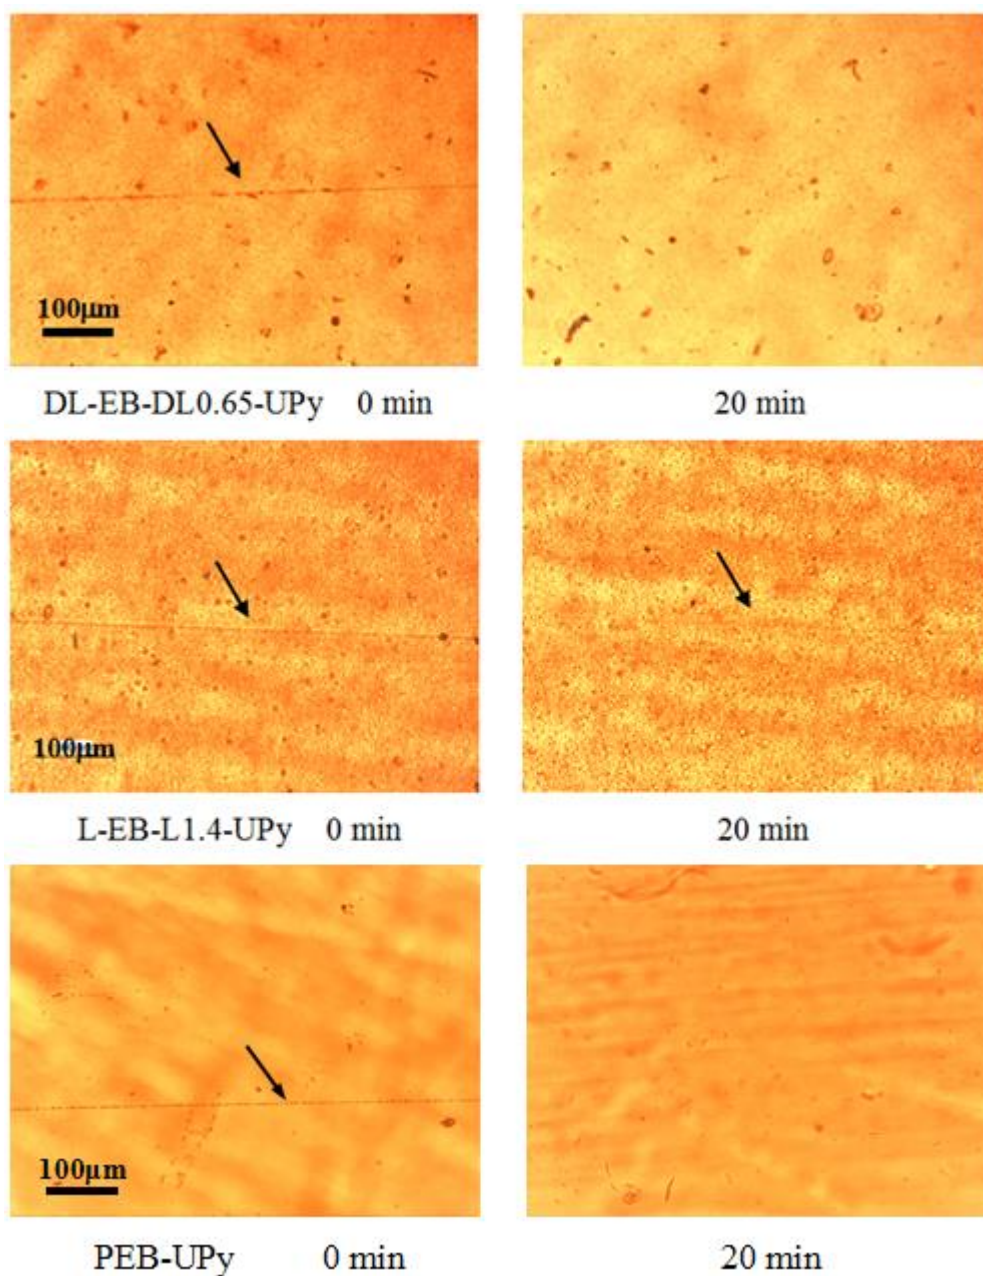

**Fig. S9** Optical microscope images of deliberately damaged samples for UPy-bonded PLA-PEB-PLA and PEB after exposing UV light for 0 and 20 min.

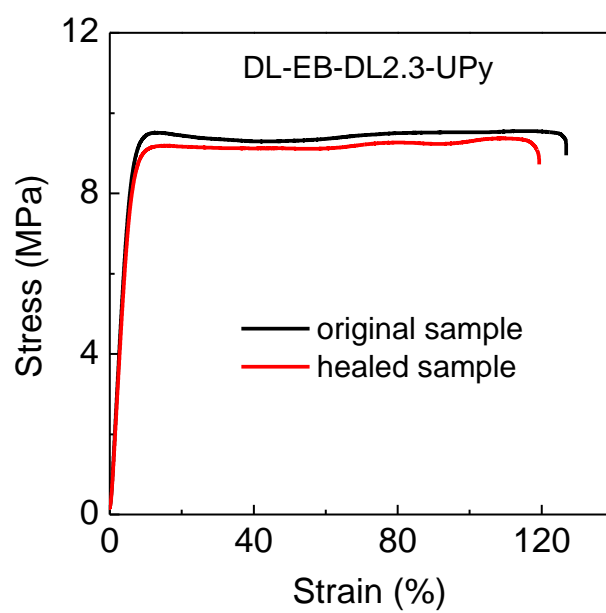

**Fig. S10** Representative stress-strain curves of original and healed DL-EB-DL2.3-UPy SMP.
